# Supplementary material for: Similar Weight Loss Induces Greater Improvements in Insulin Sensitivity and Liver Function among Individuals with NAFLD Compared to Individuals without NAFLD
Source: MDPI journal article supplement (doi:10.3390/nu11030544), 2019-03-04
Supplement: s1 [file s1]

# Similar Weight Loss Induces Stronger Improvements in Insulin Sensitivity and Liver Function among Individuals with NAFLD Compared to Individuals without NAFLD

Ruth Schübel<sup>1,2</sup>, Tobias Nonnenmacher<sup>2</sup>, Disorn Sookthai<sup>1</sup>, Sandra Gonzalez Maldonado<sup>1</sup>, Solomon A. Sowah<sup>1</sup>, Oyunbileg von Stackelberg<sup>2</sup>, Christopher L. Schlett<sup>2</sup>, Mirja E. Grafestätter<sup>1</sup>, Diana Nabers<sup>3</sup>, Theron Johnson<sup>1</sup>, Romy Kirsten<sup>4</sup>, Cornelia M. Ulrich<sup>5</sup>, Rudolf Kaaks<sup>1</sup>, Hans-Ulrich Kauczor<sup>2</sup>, Tilman Kühn<sup>1\*</sup>, and Johanna Nattenmüller<sup>2\*</sup>

<sup>1</sup> German Cancer Research Center (DKFZ), Division of Cancer Epidemiology, Im Neuenheimer Feld 581, 69120 Heidelberg, Germany

<sup>2</sup> Heidelberg University Hospital, Diagnostic and Interventional Radiology, Im Neuenheimer Feld 110, 69120 Heidelberg, Germany

<sup>3</sup> German Cancer Research Center (DKFZ), Division of Medical and Biological Informatics, Im Neuenheimer Feld 280, 69120 Heidelberg, Germany

<sup>4</sup> National Center for Tumor Diseases (NCT), Liquid Biobank, Im Neuenheimer Feld 460, 69120 Heidelberg, Germany

<sup>5</sup> Huntsman Cancer Institute and Department of Population Health Sciences, University of Utah, 2000 Circle of Hope, Salt Lake City, Utah 84112-5550, USA

\* Correspondence: Johanna.nattenmueller@med.uni-heidelberg.de; Phone: +49 6221 5636462; t.kuehn@dkfz-heidelberg.de; Phone: +49 6221 423184.

## Figures

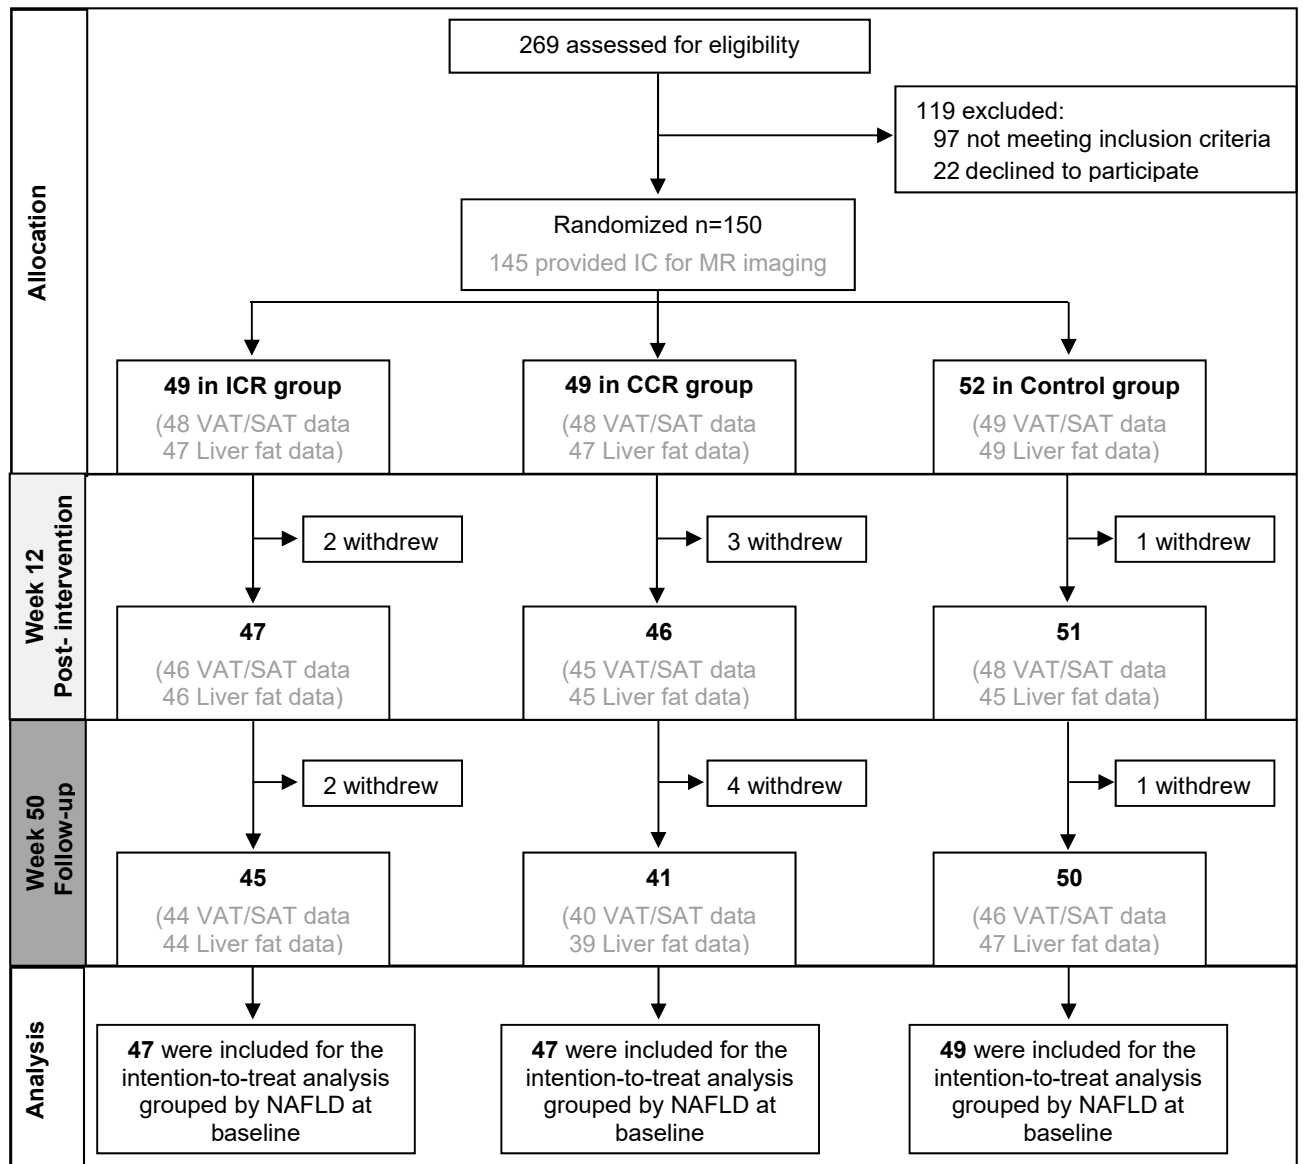

**Figure S1:** Flow chart on the HELENA Trial with indication of data sets used for the stratified analysis by NAFLD (yes/no) at study start.

Abbreviations: CCR, continuous calorie restriction; ICR, intermittent calorie restriction; NAFLD non-alcoholic fatty liver disease; SAT, subcutaneous adipose tissue; VAT, visceral adipose tissue;

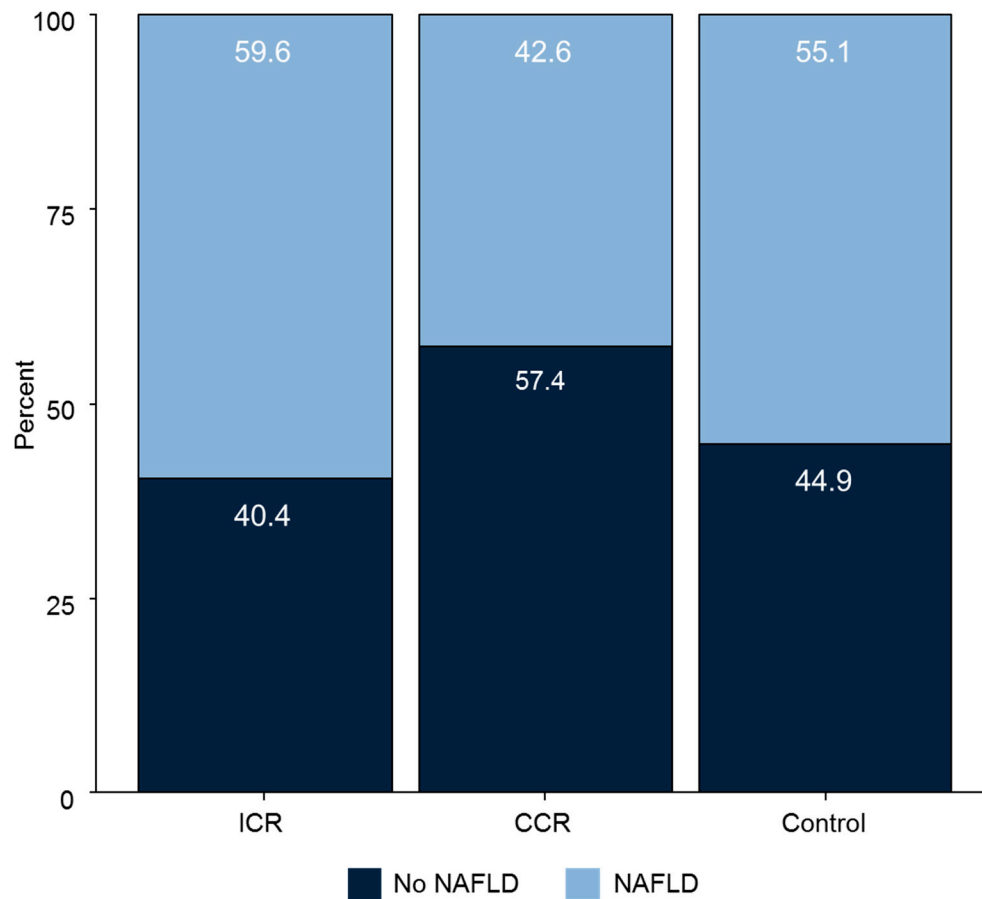

**Figure S2:** Cross-classification of study group and prevalence of NAFLD at baseline (n=143). Abbreviations: CCR, continuous calorie restriction and ICR, intermittent calorie restriction

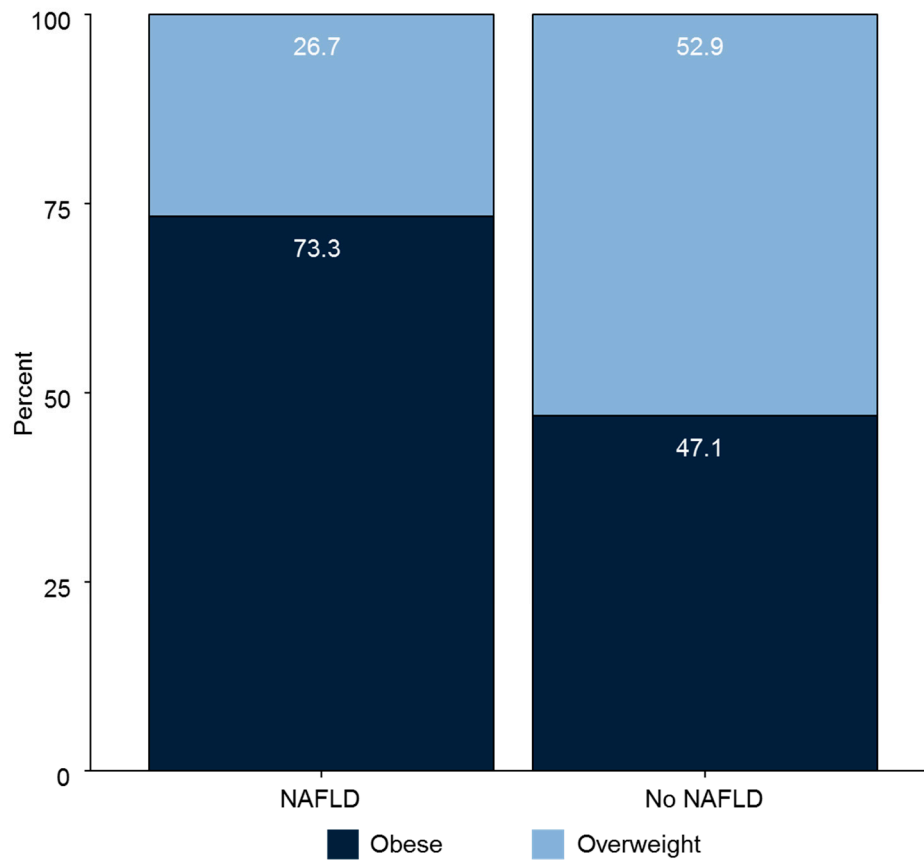

**Figure S3:** Cross-classification of BMI category (overweight: BMI  $>25\text{kg/m}^2$  to  $\leq 30\text{kg/m}^2$ ; obese: BMI  $>30\text{kg/m}^2$  to  $<40\text{kg/m}^2$ ) and prevalence of NAFLD at baseline (n=143)

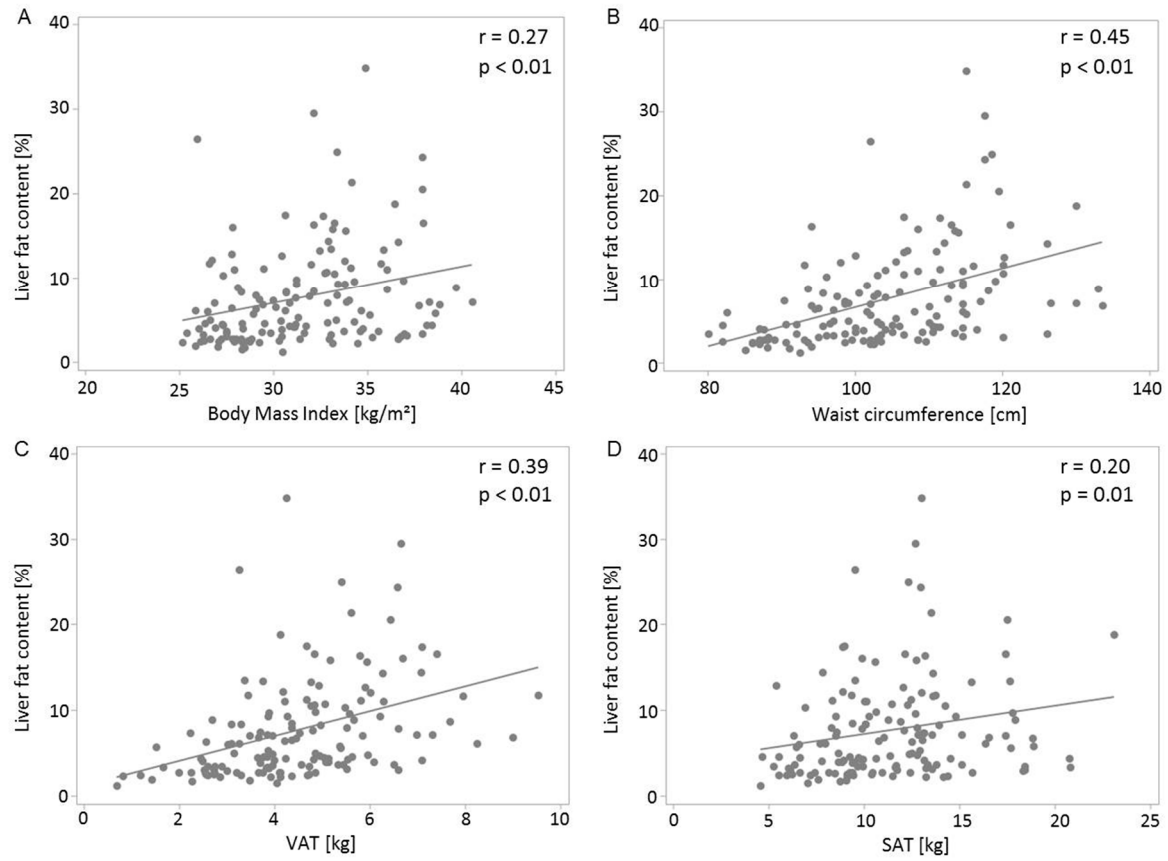

**Figure S 4:** Cross-sectional association of liver fat content and (a): Body Mass Index, (b): waist circumference, (c): height standardized visceral adipose tissue (VAT), and (d): height standardized subcutaneous adipose tissue (SAT) at baseline.

## Tables

**Table S1:** Mean values for body composition measures and metabolic biomarker levels at baseline, week 12 and week 50, stratified for the presence of NAFLD at baseline

|                         | No NAFLD at baseline<br>(n=68) |                |              | NAFLD at baseline<br>(n=75) |                |              |
|-------------------------|--------------------------------|----------------|--------------|-----------------------------|----------------|--------------|
|                         | Baseline                       | Week 12        | Week 50      | Baseline                    | Week 12        | Week 50      |
| Weight                  | 88.3 ± 12.7                    | 83.3 ± 11.4    | 84.6 ± 12.1  | 99.6 ± 14.9                 | 95.2 ± 14.9    | 96.4 ± 15.9  |
| BMI, kg/m <sup>2</sup>  | 30.3 ± 3.6                     | 28.6 ± 3.4     | 29.0 ± 3.6   | 32.4 ± 3.6                  | 31.0 ± 3.9     | 31.4 ± 4.1   |
| Waist circumference, cm | 99.2 ± 10.0                    | 94.2 ± 10.3    | 97.2 ± 11.2  | 108.9 ± 10.6                | 104.5 ± 10.9   | 107.1 ± 11.5 |
| Fat distribution        |                                |                |              |                             |                |              |
| VAT, kg                 | 3.6 ± 1.6                      | 3.1 ± 1.5      | 3.2 ± 1.6    | 5.3 ± 1.8                   | 4.6 ± 1.8      | 4.7 ± 2.1    |
| SAT, kg                 | 10.6 ± 3.8                     | 9.5 ± 3.5      | 9.6 ± 3.4    | 12.0 ± 3.6                  | 10.8 ± 3.7     | 11.1 ± 3.9   |
| Liver fat content, %    | 3.4 ± 1.0                      | 3.0 ± 1.1      | 3.1 ± 1.1    | 11.6 ± 5.9                  | 7.7 ± 4.9      | 8.9 ± 6.2    |
| Liver tests             |                                |                |              |                             |                |              |
| ALT, units/L            | 21.8 ± 9.2                     | 20.0 ± 9.0     | 21.3 ± 12.2  | 31.2 ± 10.8                 | 24.6 ± 10.2    | 26.9 ± 14.0  |
| AST, units/L            | 21.3 ± 4.6                     | 20.1 ± 4.5     | 20.2 ± 5.4   | 24.5 ± 5.4                  | 21.1 ± 5.1     | 20.9 ± 7.0   |
| GGT, units/L            | 22.5 ± 12.5                    | 18.5 ± 10.8    | 23.1 ± 18.8  | 30.7 ± 17.5                 | 23.4 ± 14.1    | 26.7 ± 17.6  |
| Metabolism              |                                |                |              |                             |                |              |
| Glucose, mg/dl          | 91.6 ± 6.8                     | 87.1 ± 8.1     | 85.8 ± 7.2   | 95.2 ± 7.9                  | 90.0 ± 8.5     | 90.9 ± 8.8   |
| Insulin, µU/ml          | 9.7 ± 4.3                      | 9.0 ± 4.5      | 7.9 ± 5.4    | 14.8 ± 7.3                  | 12.5 ± 7.1     | 11.4 ± 6.7   |
| HOMA-IR                 | 2.2 ± 1.0                      | 2.0 ± 1.1      | 1.7 ± 1.2    | 3.5 ± 1.8                   | 2.8 ± 1.7      | 2.6 ± 1.6    |
| HbA1c, %                | 5.4 ± 0.3                      | 5.4 ± 0.3      | 5.3 ± 0.3    | 5.5 ± 0.3                   | 5.5 ± 0.3      | 5.4 ± 0.4    |
| LDL, mg/dl              | 124.1 ± 28.4                   | 113.2 ± 25.6   | 128.3 ± 28.0 | 126.8 ± 26.4                | 119.6 ± 26.5   | 125.5 ± 29.5 |
| HDL, md/dl              | 58.0 ± 14.1                    | 52.1 ± 13.0    | 55.7 ± 12.8  | 50.4 ± 13.5                 | 46.0 ± 12.4    | 49.1 ± 12.6  |
| Adipokines              |                                |                |              |                             |                |              |
| Leptin, ng/ml           | 25.4 ± 23.5                    | 18.1 ± 21.8    | 21.4 ± 27.4  | 24.0 ± 23.0                 | 16.2 ± 15.6    | 20.4 ± 20.9  |
| Resistin, ng/ml         | 6.0 ± 2.7                      | 6.9 ± 2.8      | 5.5 ± 2.3    | 5.4 ± 2.1                   | 6.5 ± 2.5      | 5.4 ± 2.4    |
| CRP, ng/pl              | 4.1 ± 4.8                      | 3.7 ± 4.3      | 4.3 ± 6.1    | 5.0 ± 6.4                   | 3.9 ± 4.3      | 4.3 ± 6.4    |
| Dietary intake          |                                |                |              |                             |                |              |
| Energy intake, kcal     | 2040.4 ± 599.0                 | 1558.2 ± 440.0 |              | 2219.0 ± 572.8              | 1690.0 ± 468.7 |              |
| Fat, %                  | 35.7 ± 4.9                     | 17.5 ± 3.0     |              | 36.6 ± 5.0                  | 31.4 ± 5.9     |              |
| Carbohydrates, %        | 43.9 ± 6.2                     | 47.3 ± 7.0     |              | 42.9 ± 6.5                  | 45.4 ± 6.8     |              |
| Protein, %              | 15.4 ± 3.3                     | 17.5 ± 3.0     |              | 15.2 ± 2.7                  | 17.8 ± 3.6     |              |
| Fibers, g/day           | 17.9 ± 7.4                     | 20.5 ± 7.4     |              | 17.9 ± 6.0                  | 21.2 ± 9.3     |              |

Data are shown as mean±SD.

Abbreviations: ALT, alanine transaminase; AST, aspartate transaminase; GGT, gamma-glutamyl transpeptidase; HDL, high density lipoprotein; HOMA-IR homeostatic model of insulin resistance; LDL, low density lipoprotein; SAT subcutaneous adipose tissue; VAT, visceral adipose tissue
